# Supplementary material for: Transcriptional control of human p53-regulated genes
Source: Springer Nature journal article supplement (doi:10.1038/nrm2395), 2008-04-23
Supplement: 41580_2008_BFnrm2395_MOESM81_ESM.pdf [file 41580_2008_BFnrm2395_MOESM81_ESM.pdf]

Supplementary information S1 (table) | Description of genes regulated by p53 (part I)\*

| #  | Gene Name(s)    | Short Description                                | Accession # | 1st Half-site | Spacer           | 2nd Half-site | Refs |
|----|-----------------|--------------------------------------------------|-------------|---------------|------------------|---------------|------|
| 1  | ABCB1, MDR1     | ATP-binding cassette sub-family B member 1       | AF016535    | GGGCAGGAACA   | gcgccgggct       | GGGCTGAGCA    | 1    |
| 2  | ACTA2           | smooth muscle alpha-actin                        | NM_001613   | AACCATGCCT    |                  | GCATCTGCC     | 2    |
| 3  | AIFM2, AMID     | apoptosis-inducing factor, mitochondrion-assoc.  | NM_032797   | AGGCATGAGC    | caccgtgcct       | GGCCATGCC     | 3    |
| 3  | AIFM2, AMID     | apoptosis-inducing factor, mitochondrion-assoc.  | NM_032797   | AGGTCTCGCTA   | tggtgccc         | AGGCTGGTCT    | 3    |
| 4  | ANLN            | anillin, actin binding protein                   | NM_018685   | GAACTGGCTT    | ttctga           | GGCCAGGCC     | 4    |
| 5  | APAF1           | apoptotic peptidase activating factor 1          | NM_001160   | AGACATGTCT    | ggagaccctagga    | CGACAAGCCC    | 5    |
| 6  | APC             | adenomatosis polyposis coli                      | NM_000038   | GGGCATACCC    | ccgaggggtacg     | GGGCTAGGGCt   | 6    |
| 7  | ARID3A, E2FBP1  | AT rich interactive domain 3A (BRIGHT-like)      | NM_005224   | GGACACGCTG    |                  | GGACATGCCT    | 7    |
| 8  | ATF3            | activating transcription factor 3                | NM_001674   | AGTCATGCCG    | ctggcttggcaccatt | GGTCATGCCT    | 8    |
| 9  | BAI1            | brain-specific angiogenesis inhibitor 1          | NM_001702   | tGGCTGCCT     |                  | GGACATGTTC    | 9    |
| 10 | BAX             | BCL2-associated X protein                        | NM_004324   | GGGCAGGCC     |                  | GGGCTTGTCG    | 10   |
| 11 | BBC3, PUMA      | BCL2 binding component 3                         | NM_014417   | CTGCAAGTCC    |                  | TGACTTGTC     | 11   |
| 12 | BCL2L14, BCL-G  | BCL2-like 14 (apoptosis facilitator)             | NM_030766   | AGCCAAGGCT    |                  | GGTCTTGAAC    | 12   |
| 13 | BCL6            | B-cell CLL/lymphoma 6 (zinc finger protein 51)   | NM_001706   | AGACAGTGCTT   | gggggtgattc      | GGGCTAGTCT    | 13   |
| 14 | BDKRB2, BK2     | bradykinin receptor B2                           | NM_000623   | GGAagTGCCC    |                  | AGGagcTga     | 14   |
| 15 | BID             | BH3 interacting domain death agonist             | NM_197966   | GGGCATGATG    |                  | GTGCATGCCT    | 15   |
| 16 | BIRC5, survivin | baculoviral IAP repeat-containing 5 (survivin)   | NM_001168   | GGGCGTGCGC    | tcc              | CGACATGCC     | 16   |
| 17 | BNIP3L          | BCL2/adenovirus E1B interacting protein 3-like   | NM_004331   | AAGCTAGTCT    | cagtg            | GcGCATGCCT    | 17   |
| 18 | BTG2, TIS21     | BTG family, member 2                             | NM_006763   | AGTCCGGGCA    | g                | AGCCCAGCA     | 18   |
| 19 | C12orf5         | chromosome 12 open reading frame 5               | NM_020375   | AGACATGTCC    | ac               | AGACTTGCT     | 19   |
| 20 | C13orf15, RGC32 | chromosome 13 open reading frame 15              | NM_014059   | AGGCgAGTTT    | aag              | cAGCTTGTC     | 20   |
| 21 | CASP1           | caspase 1, apoptosis-related cysteine peptidase  | NM_033292   | AGACATGCAT    |                  | ATGCATGCa     | 21   |
| 22 | CASP10          | caspase 10, apoptosis-related cys-peptidase      | NM_032977   | AAACTTGCTg    | gttta            | AAcTTGgCT     | 22   |
| 23 | CASP6           | caspase 6, apoptosis-related cysteine peptidase  | NM_001226   | AGGCAAGGAG    | tttg             | AGACAAGTCT    | 23   |
| 24 | CAV1            | caveolin 1, caveolae protein, 22kDa              | NM_001753   | GCCCAAGCAC    | cccagcgcg        | GGAGAAcGTTC   | 24   |
| 25 | CCNG1           | cyclin G1                                        | NM_004060   | GcACAAGCCC    |                  | AGGCTAGTCC    | 25   |
| 26 | CCNK            | cyclin K                                         | NM_003858   | AAACTAGCTT    | gc               | AGACATGCTg    | 26   |
| 27 | CD82, KAI1      | CD82 molecule                                    | NM_002231   | AGGCAAGCT     | ggggca           | GctCAAGCCT    | 27   |
| 28 | CDC25C          | cell division cycle 25 homolog C (S. pombe)      | NM_001790   | GGGCAAGTCT    | taccattcca       | GAGCAAGCaC    | 28   |
| 29 | CDKN1A, p21     | cyclin-dependent kinase inhibitor 1A (p21, Cip1) | NM_000389   | AGACTGGGCA    |                  | TGTCTGGGCA    | 29   |
| 29 | CDKN1A, p21     | cyclin-dependent kinase inhibitor 1A (p21, Cip1) | NM_000389   | GAAgAAGaCT    |                  | GGGCATGTCT    | 30   |
| 29 | CDKN1A, p21     | cyclin-dependent kinase inhibitor 1A (p21, Cip1) | NM_000389   | GAACATGTCC    |                  | cAACATGTTg    | 30   |

|    |                     |                                                    |           |             |                    |              |    |
|----|---------------------|----------------------------------------------------|-----------|-------------|--------------------|--------------|----|
| 30 | Chmp4C              | chromatin modifying protein 4C                     | NM_152284 | AAACAAGCCC  | agtagcagcagctgctcc | GAGCTTGCCC   | 31 |
| 31 | COL18A1             | collagen, type XVIII, alpha 1                      | NM_030582 | TGACATGTGT  |                    | GAGCATGTAT   | 12 |
| 31 | COL18A1             | collagen, type XVIII, alpha 1                      | NM_030582 | TGACATGTGT  |                    | GAGCATGTAT   | 12 |
| 32 | CRYZ                | crystallin, zeta (quinone reductase)               | NM_001889 | ctGCAAGTCC  | att                | AAACcTGTTT   | 4  |
| 33 | CTSD, IRDD          | cathepsin D                                        | NM_001909 | AAcCTTGgTT  |                    | tgcAAgAgGCTT | 32 |
| 33 | CTSD, IRDD          | cathepsin D                                        | NM_001909 | AAGCTgGgCC  |                    | GGGCTgaCCC   | 32 |
| 34 | CX3CL1, fractalkine | chemokine (C-X3-C motif) ligand 1                  | NM_002996 | GGGCATGTTC  | c                  | CAGCTGTGG    | 33 |
| 35 | DDB2                | damage-specific DNA binding protein 2, 48kDa       | NM_000107 | GAACAAGCCC  | t                  | GGGCATGTTT   | 34 |
| 36 | DDIT4, REDD1        | DNA-damage-inducible transcript 4                  | NM_019058 | AAACAAGTCT  |                    | TTCCTTGATC   | 35 |
| 37 | DDR1                | discoidin domain receptor family, member 1         | NM_013994 | GAGCTGGTCC  |                    | AGGCTTATCT   | 36 |
| 38 | DKK1                | dickkopf homolog 1 ( <i>Xenopus laevis</i> )       | NM_012242 | AGCCAAGCTT  | ttaatg             | AACCAAGTTC   | 37 |
| 39 | DNMT1               | DNA (cytosine-5-)-methyltransferase 1              | NM_001379 | GCGCATGCGT  | gttccct            | GGGCATGGCC   | 38 |
| 40 | DUSP1, MKP1         | dual specificity phosphatase 1                     | NM_004417 | GGTCCTGCC   | a                  | GGCAAATGGG   | 39 |
| 41 | DUSP5               | dual specificity phosphatase 5                     | NM_004419 | CAACAAGCCC  | t                  | TGTCTAGTGC   | 40 |
| 42 | EDN2                | endothelin 2                                       | NM_001956 | CTGCAAGCCC  |                    | GGGCATGCC    | 41 |
| 43 | EEF1A1              | eukaryotic translation elongation factor 1 alpha 1 | NM_001402 | GGGCAGACCC  | ga                 | GAGCATGCC    | 42 |
| 43 | EEF1A1              | eukaryotic translation elongation factor 1 alpha 1 | NM_001402 | GGACACGTAG  | attc               | GGGCAAGTCC   | 42 |
| 43 | EEF1A1              | eukaryotic translation elongation factor 1 alpha 1 | NM_001402 | AAACATGATT  | ac                 | AGGGACATCT   | 42 |
| 44 | EGFR                | epidermal growth factor receptor                   | NM_005228 | GAGCTAGACG  | tcc                | GGGCAGCCCC   | 43 |
| 45 | EphA2               | EPH receptor A2                                    | NM_004431 | CACCATGTTG  | gcc                | AGGCATGTCT   | 44 |
| 46 | FANCC, FAC          | Fanconi anemia, complementation group C            | NM_000136 | GGACATGTTT  | aaatacttga         | GAGCTATTTT   | 45 |
| 47 | FAS, CD95           | Fas (TNF receptor superfamily, member 6)           | NM_000043 | GGACAAGCCC  |                    | TGACAAGCCA   | 46 |
| 48 | FDXR                | ferredoxin reductase                               | NM_024417 | GGGCgAgGagC |                    | GGGCTTGCCC   | 47 |
| 49 | GADD45A             | growth arrest and DNA-damage-inducible, alpha      | NM_001924 | GAACATGTCT  |                    | AAGCATGCTG   | 48 |
| 50 | GDF15, MIC-1        | growth differentiation factor 15                   | NM_004864 | AGCCATGCC   |                    | GGGCAAGAAC   | 49 |
| 50 | GDF15, MIC-1        | growth differentiation factor 15                   | NM_004864 | CATCTTGCCC  |                    | AGACTTGCT    | 50 |
| 51 | GML                 | GPI anchored molecule like protein                 | NM_002066 | AtGCTTGCCC  |                    | AGGCATGTCC   | 51 |
| 52 | GPX1                | glutathione peroxidase 1                           | NM_000581 | GGGCCAGACC  |                    | AGACATGCCT   | 19 |
| 53 | HBV                 | hepatitis B virus                                  | get_this  | TTGCATGTAT  | acaagct            | AAACAGGCTT   | 52 |
| 54 | HD, Huntington      | huntingtin (Huntington disease)                    | NM_002111 | ATGCTTGTTT  | tacagaa            | GAGCATGTTA   | 53 |
| 54 | HD, Huntington      | huntingtin (Huntington disease)                    | NM_002111 | CGCCATGTTG  | gcc                | AGGCTGGTCT   | 53 |
| 54 | HD, Huntington      | huntingtin (Huntington disease)                    | NM_002111 | GGGCCTGCTT  | ccagtt             | AAGCTTGCTT   | 53 |
| 55 | HGF, SF             | hepatocyte growth factor                           | NM_000601 | ACACATGTAT  |                    | TTTCTGTTT    | 54 |
| 56 | HIC1                | hypermethylated in cancer 1                        | NM_006497 | GGGCGCTGCC  |                    | TGGCACAGCTC  | 55 |
| 57 | HRAS, c-Ha-Ras      | Harvey rat sarcoma viral oncogene homolog          | NM_176795 | large       | cluster            | site         | 56 |

|    |                     |                                                  |           |             |                |             |    |
|----|---------------------|--------------------------------------------------|-----------|-------------|----------------|-------------|----|
| 58 | HSP90AB1, hsp90beta | heat shock protein 90kDa alpha B 1               | NM_007355 | GGGACTGTCT  | gggtatcgga     | AAGCAAGCCT  | 57 |
| 59 | HSPA8               | heat shock 70kDa protein 8                       | NM_006597 | GcACTAGTTC  | tggaacct       | GcGCgTGCTT  | 4  |
| 60 | IBRDC2, p53RFP      | IBR domain containing 2                          | NM_182757 | AGACAGGTCC  |                | TGACAAGCAG  | 58 |
| 61 | IER3, IEX-1         | immediate early response 3                       | NM_003897 | GCCACATGCCT |                | CGACATGTGCC | 59 |
| 62 | IGFBP3              | insulin-like growth factor binding protein 3     | NM_000598 | large       | cluster        | site        | 60 |
| 62 | IGFBP3              | insulin-like growth factor binding protein 3     | NM_000598 | GGGCAAGACC  |                | TGCCAAGCCT  | 60 |
| 62 | IGFBP3              | insulin-like growth factor binding protein 3     | NM_000598 | AAACAAGCCA  | c              | CAACATGCTT  | 60 |
| 63 | IRF5                | interferon regulatory factor 5                   | NM_032643 | AGGCATGCCa  | ca             | AGGCATGgTC  | 61 |
| 64 | KRT8, CK8           | keratin 8                                        | NM_002273 | ccGCcTGCCT  | cc             | ActCcTGCCT  | 62 |
| 65 | LGALS3, galectin-3  | lectin, galactoside-binding, soluble, 3          | NM_002306 | GGGCTTGCAA  | gctg           | GAGCCTTGTTT | 63 |
| 66 | LIF                 | leukemia inhibitory factor                       | NM_002309 | GGACATGTCCG |                | GGACAGCTC   | 64 |
| 67 | LRDD, PIDD          | leucine-rich repeats and death domain containing | NM_018494 | AGGCcTGCCT  | gcgtgctg       | GGACATGTCT  | 65 |
| 68 | MAD1L1, MAD1        | MAD1 mitotic arrest deficient-like 1 (yeast)     | NM_003550 | GATTCAAGCTG |                | ATACTGAGT   | 66 |
| 69 | mdm2                | Mdm2, transformed 3T3 cell double minute 2       | NM_002392 | AGTTAAGTCC  |                | TGACTTGCT   | 67 |
| 69 | mdm2                | Mdm2, transformed 3T3 cell double minute 2       | NM_002392 | GGTCAAGTTC  |                | AGACACGTTc  | 67 |
| 70 | MET                 | met proto-oncogene                               | NM_000245 | ggaeggacag  | cacgcgaggcagac | AGACAcGTgC  | 68 |
| 71 | MLH1                | mutL homolog 1, colon cancer                     | NM_000249 | AGGCATGTAC  | a              | GCGCATGCCC  | 69 |
| 72 | MMP2                | matrix metalloproteinase 2                       | NM_004530 | AGACAAGCCT  |                | GAACCTGTCT  | 70 |
| 73 | MSH2                | mutS homolog 2                                   | NM_000251 | GAcCTAGgCg  | c              | AGGCATGCgC  | 71 |
| 73 | MSH2                | mutS homolog 2                                   | NM_000251 | AGGCTAGTTT  | ttttttgttttc   | AAGTTTCCTT  | 72 |
| 74 | NDRG1               | N-myc downstream regulated gene 1                | NM_006096 | CCACATGCAC  | acgcacgagcgc   | GCACATGAAC  | 73 |
| 75 | NLRC4, Ipaf         | NLR family, CARD domain containing 4             | NM_021209 | AGACATGTTC  |                | CTGGTAGTTT  | 74 |
| 76 | NOS3                | nitric oxide synthase 3 (endothelial cell)       | NM_000603 | GAGCcTcCCa  | gcc            | GGGCTTGTTc  | 75 |
| 77 | ODC1                | ornithine decarboxylase 1                        | NM_002539 | GGACcAGTTC  | caggc          | GGGcAGaCC   | 4  |
| 77 | ODC1                | ornithine decarboxylase 2                        | NM_002539 | GGGCTcGCCT  | tggtacagac     | GAGCggGCCC  | 4  |
| 78 | P2RXL1              | purinergic receptor P2X-like 1, orphan receptor  | NM_005446 | GAACAAGggC  | at             | GAGCTTGCT   | 76 |
| 79 | P53AIP1             | p53-regulated apoptosis-inducing protein 1       | NM_022112 | TCTCTTGCCC  |                | GGGCTTGTCG  | 77 |
| 80 | PCBP4, MCG10        | poly(rC) binding protein 4                       | NM_020418 | GgtCTTGgCCC |                | AGACTTAGCaC | 78 |
| 80 | PCBP4, MCG10        | poly(rC) binding protein 4                       | NM_020418 | GAACTT      | aagaccgagcctct | GGACAAGTT   | 78 |
| 81 | PCNA                | proliferating cell nuclear antigen               | NM_002592 | GAACAAGTCC  |                | GGGCATaTgT  | 79 |
| 82 | PERP                | PERP, TP53 apoptosis effector                    | NM_022121 | AGGCAAGCTC  |                | CAGCTTGTTc  | 80 |
| 83 | PLAGL1, ZAC         | pleiomorphic adenoma gene-like 1                 | BC074814  | CAACTAGACT  |                | AGACTAGCTT  | 81 |
| 84 | PLK2, SNK           | polo-like kinase 2 (Drosophila)                  | NM_006622 | AGACATGgTg  | tgt            | AAACTAGCTT  | 82 |
| 84 | PLK2, SNK           | polo-like kinase 2 (Drosophila)                  | NM_006622 | GGtCATGaTT  | cct            | tAACTTGCCCT | 82 |
| 84 | PLK2, SNK           | polo-like kinase 2 (Drosophila)                  | NM_006622 | AAACATGCCT  |                | GGACTTGCCC  | 82 |

|     |                   |                                                 |              |             |                |             |     |
|-----|-------------------|-------------------------------------------------|--------------|-------------|----------------|-------------|-----|
| 85  | PLK3              | polo-like kinase 3 (Drosophila)                 | NM_004073    | TAACATGCCC  | gggcaa         | AAGCGAGCGC  | 19  |
| 86  | PML               | promyelocytic leukemia                          | NM_002675    | GcGCTgGCCT  | ggagccag       | GGGCATGTCC  | 83  |
| 87  | PMS2              | PMS2 postmeiotic segregation increased 2        | NM_000535    | ATACTTGATT  | tg             | TTTCTTGATA  | 69  |
| 88  | PPM1J, MGC19531   | protein phosphatase 1J (PP2C domain containing) | NM_005167    | GAACATGCCT  |                | GAGCAAGCCC  | 41  |
| 89  | PRDM1, BLIMP1     | PR domain containing 1, with ZNF domain         | NM_182907    | GTGCAAGTCT  |                | GGACATGTTT  | 84  |
| 90  | PRKAB1, AMPKbeta1 | protein kinase, AMP-activated, beta 1           | NM_006253    | GTTCTTGCCG  |                | CGGCTTGCCCT | 19  |
| 91  | PTEN              | phosphatase and tensin homolog                  | NM_000314    | GAGCAAGCCC  | caggcagctacact | GGGCATGCTC  | 85  |
| 92  | PTK2, FAK         | PTK2 protein tyrosine kinase 2                  | NM_153831    | AAGCAAGCC   |                | no 2nd site | 86  |
| 93  | PYCARD, ASC       | PYD and CARD domain containing                  | NM_013258    | GTGCAAGCCC  | ag             | AGACAAGCAC  | 87  |
| 94  | RABGGTA           | Rab geranylgeranyltransferase, alpha subunit    | NM_004581    | CCTCTGTGG   | aacgtgca       | AAGCCTGTCC  | 19  |
| 95  | RB1               | retinoblastoma 1 (including osteosarcoma)       | NM_000321    | GGGCGTGCCC  | cgac           | GTGCgcGCgC  | 88  |
| 96  | RFWD2, COP1       | ring finger and WD repeat domain                | NM_022457    | AGACTTGCCCT | gt             | GAACAGTCAC  | 89  |
| 97  | RPS27L            | ribosomal protein S27-like                      | NM_015920    | GGGCATGTAG  |                | TGACTTGCCC  | 41  |
| 98  | RRM2B, p53R2      | ribonucleotide reductase M2 B                   | NM_015713    | tGACATGCCC  |                | AGGCATGTCT  | 90  |
| 99  | S100A2            | S100 calcium binding protein A2                 | NM_005978    | GGGCATGTgT  |                | GGGCAcGTTC  | 91  |
| 100 | SCARA3, CSR1      | scavenger receptor class A, member 3            | NM_016240    | GGGCAAGCCC  |                | AGACAAGTTg  | 92  |
| 101 | SCD               | stearoyl-CoA desaturase (delta-9-desaturase)    | NM_005063    | GGGCcgGTCC  | t              | GGGCTAGgCT  | 4   |
| 102 | SCN3B             | sodium channel, voltage-gated, type III, beta   | NM_018400    | TGACTTGCTC  |                | TGCCTTGCTC  | 93  |
| 102 | SCN3B             | sodium channel, voltage-gated, type III, beta   | NM_018400    | TGGCAAGGCT  |                | GAGCTAGTTC  | 93  |
| 103 | SERPINB5, maspin  | serpin peptidase inhibitor, clade B, member 5   | NM_002639    | GAACATGTTg  | g              | AGGCcTtTTg  | 94  |
| 104 | SERPINE1          | serpin peptidase inhibitor, clade E, member 1   | NM_000602    | AcACATGCCT  |                | cAGCAAGTCC  | 95  |
| 105 | SESN1, PA26       | sestrin 1                                       | AF033120     | GGACAAGTCT  |                | CCACAAGTCa  | 96  |
| 106 | SFN, 14-3-3sigma  | stratifin                                       | NM_006142    | AGCATTAGCCC |                | AGACATGTCC  | 97  |
| 107 | SH2D1A, SAP       | SH2 domain protein 1A, Duncan's disease         | NM_002351    | GGCTGGCTC   | agetgt         | CAGCTTGCTT  | 98  |
| 107 | SH2D1A, SAP       | SH2 domain protein 1A, Duncan's disease         | NM_002351    | GGGCTGGCTC  |                | GGCTGGCTC   | 98  |
| 107 | SH2D1A, SAP       | SH2 domain protein 1A, Duncan's disease         | NM_002351    | CAACACTGCAC | tagt           | GGGCTGGCTC  | 98  |
| 108 | SLC38A2           | solute carrier family 38, member 2              | NM_018976    | AAcCATGCTg  | ttacacgcacc    | AGCTTGTC    | 4   |
| 109 | STEAP3, TSAP6     | STEAP family member 3                           | NM_001008410 | AGACAAGCAT  | ag             | GGACATGCTC  | 99  |
| 110 | TAP1              | transporter 1, ATP-binding cassette             | NM_000593    | GGGCTTGgCC  | ctgccc         | GGACTTGCCCT | 100 |
| 111 | TGFA              | transforming growth factor, alpha               | NM_003236    | GGGCAGGCC   |                | TGCCTAGTCT  | 101 |
| 112 | TNFRSF10A, DR4    | tumor necrosis factor receptor superfamily, 10a | NM_003844    | GGGCATGTCC  |                | GGGCAgGagg  | 102 |
| 113 | TNFRSF10B, DR5    | tumor necrosis factor receptor superfamily, 10b | NM_003842    | GGGCATGTCC  |                | GGGCAAGaCg  | 103 |
| 114 | TNFRSF10C, DcR1   | tumor necrosis factor receptor superfamily, 10c | NM_003841    | GGGCATGTCC  |                | GGGCAGGACG  | 104 |
| 115 | TNFRSF10D, DcR2   | tumor necrosis factor receptor superfamily, 10d | NM_003840    | GGGCATGTCT  |                | GGGCAGGACG  | 104 |
| 116 | TP53, p53         | tumor protein p53 (Li-Fraumeni syndrome)        | NM_000546    | TTACTTGCCC  |                | TTACTTGTCa  | 105 |

|     |                |                                                 |           |             |                |             |     |
|-----|----------------|-------------------------------------------------|-----------|-------------|----------------|-------------|-----|
| 117 | TP53i3, Pig3   | tumor protein p53 inducible protein 3           | NM_004881 | large       | cluster        | site        | 106 |
| 118 | TP53INP1       | tumor protein p53 inducible nuclear protein 1   | NM_033285 | GAACCTGggg  |                | GAACATGTTT  | 107 |
| 119 | TP63, TP73L    | tumor protein p63, p73-like Delta N variant     | AF075433  | TAACCTGTTA  | ttg            | AAACATGCTC  | 108 |
| 120 | TP73, p73      | tumor protein p73                               | NM_005427 | GtACTTGCCg  | tccgggga       | GAACCTGCag  | 109 |
| 120 | TP73, p73      | tumor protein p73                               | NM_005427 | GAACCTGCag  | agtaagctgga    | GAGCTTGaaT  | 109 |
| 121 | TP73:Delta     | tumor protein p73 Delta N variant               | AY040827  | GGGCAAGCT   | gaggcctgcccc   | GGACTTGGAT  | 110 |
| 122 | TRIAP1, p53CSV | TP53 regulated inhibitor of apoptosis 1         | NM_016399 | CTTCATGTCC  |                | GTGCATGCCT  | 111 |
| 123 | TRIM22, Staf50 | tripartite motif-containing 22                  | NM_006074 | TGACATGTCT  |                | AGGCATGTAG  | 112 |
| 124 | TRPM2          | transient receptor potential cation channel, M2 | NM_003307 | GGCCTTGCCCT | tgctc          | AGGCCTGCCT  | 4   |
| 124 | TRPM2          | transient receptor potential cation channel, M2 | NM_003307 | GAGCAGGTCT  | gacctgctccca   | GGGCCTGCCT  | 4   |
| 124 | TRPM2          | transient receptor potential cation channel, M2 | NM_003307 | TGCCTTGCTC  |                | AGGCCTGCCT  | 4   |
| 125 | TSC2           | tuberous sclerosis 2                            | NM_000548 | TAACAAGCTC  | g              | GGGCTAGCCC  | 113 |
| 125 | TSC2           | tuberous sclerosis 2                            | NM_000548 | AGGCTAGTCT  | gaaactctgggc   | TGACGTGAC   | 113 |
| 125 | TSC2           | tuberous sclerosis 2                            | NM_000548 | GGGCATGGTG  |                | GCACATGCCT  | 113 |
| 126 | TYRP1, TRP-1   | tyrosinase-related protein 1                    | NM_000550 | CGCCTAGTTT  | gggt           | GAGCAGATT   | 114 |
| 126 | TYRP1, TRP-1   | tyrosinase-related protein 1                    | NM_000550 | GAGCAGATT   | tgggattaattatc | AGGCAGCAA   | 114 |
| 126 | TYRP1, TRP-1   | tyrosinase-related protein 1                    | NM_000550 | CCACATGCAC  | t              | TAACAGTTC   | 114 |
| 126 | TYRP1, TRP-1   | tyrosinase-related protein 1                    | NM_000550 | AGACCAGCCC  | cc             | CGCCTAGTTT  | 114 |
| 126 | TYRP1, TRP-1   | tyrosinase-related protein 1                    | NM_000550 | AGGCAGCAA   | t              | CCACATGCAC  | 114 |
| 127 | UBD, FAT10     | ubiquitin D                                     | NM_006398 | AGGCATGCTC  |                | AGTGCCGTGG  | 115 |
| 128 | VCAN, CSPG2    | versican                                        | NM_004385 | AGACTTGCC   | a              | CAGACAAGTCC | 116 |
| 129 | VDR            | vitamin D (1,25- dihydroxyvitamin D3) receptor  | NM_000376 | TAACTAGTTT  |                | GAACAAGTTG  | 117 |
| 129 | VDR            | vitamin D (1,25- dihydroxyvitamin D3) receptor  | NM_000376 | AGGTTAGATG  | tac            | TAACTAGTTT  | 117 |

\*This table provides the gene names, the accession numbers and the DNA response elements (REs) of experimentally validated p53-regulated genes. The REs typically consist of two half sites separated by a variable length spacer. Exceptional cases consist of only one apparent half site. The REs that consist of many (>4) half sites are annotated as 'large cluster sites', and as such, are too large to include in the space provided.

## References

1. Johnson, R. A., Ince, T. A. & Scotto, K. W. Transcriptional repression by p53 through direct binding to a novel DNA element. *J Biol Chem* 276, 27716–27720 (2001).
2. Wang, L. et al. Analyses of p53 Target Genes in the Human Genome by Bioinformatic and Microarray Approaches. *J. Biol. Chem.* 276, 43604–43610 (2001).
3. Wu, M. et al. AMID is a p53-inducible gene downregulated in tumors. *Oncogene* 23, 6815–6819 (2004).
4. Mirza, A. et al. Global transcriptional program of p53 target genes during the process of apoptosis and cell cycle progression. *Oncogene* 22, 3645–3654 (2003).
5. Robles, A. I., Bemmels, N. A., Foraker, A. B. & Harris, C. C. APAF-1 is a transcriptional target of p53 in DNA damage-induced apoptosis. *Cancer Res* 61, 6660–6664 (2001).
6. Jaiswal, A. S. & Narayan, S. p53-dependent transcriptional regulation of the APC promoter in colon cancer cells treated with DNA alkylating agents. *J Biol Chem* 276, 18193–18199 (2001).
7. Ma, K. et al. E2FBP1/DRIL1, an AT-rich interaction domain-family transcription factor, is regulated by p53. *Mol Cancer Res* 1, 438–444 (2003).
8. Zhang, C. et al. Transcriptional activation of the human stress-inducible transcriptional repressor ATF3 gene promoter by p53. *Biochem Biophys Res Commun* 297, 1302–1310 (2002).
9. Soussi, T. p53 alterations in human cancer: more questions than answers. *Oncogene* 26, 2145–2156 (2007).
10. Thornborrow, E. C., Patel, S., Mastropietro, A. E., Schwartzfarb, E. M. & Manfredi, J. J. A conserved intronic response element mediates direct p53-dependent transcriptional activation of both the human and murine bax genes. *Oncogene* 21, 990–999 (2002).
11. Nakano, K. & Vousden, K. H. PUMA, a novel proapoptotic gene, is induced by p53. *Mol Cell* 7, 683–694 (2001).
12. Miled, C., Pontoglio, M., Garbay, S., Yaniv, M. & Weitzman, J. B. A genomic map of p53 binding sites identifies novel p53 targets involved in an apoptotic network. *Cancer Res* 65, 5096–5104 (2005).
13. Margalit, O. et al. BCL6 is regulated by p53 through a response element frequently disrupted in B-cell non-Hodgkin lymphoma. *Blood* 107, 1599–1607 (2006).
14. Saifudeen, Z., Du, H., Dipp, S. & El-Dahr, S. S. The bradykinin type 2 receptor is a target for p53-mediated transcriptional activation. *J Biol Chem* 275, 15557–15562 (2000).
15. Sax, J. K. et al. BID regulation by p53 contributes to chemosensitivity. *Nat Cell Biol* 4, 842–849 (2002).
16. Hoffman, W. H., Biade, S., Zilfou, J. T., Chen, J. & Murphy, M. Transcriptional repression of the anti-apoptotic survivin gene by wild type p53. *J Biol Chem* 277, 3247–3257 (2002).
17. Fei, P. et al. Bnip3L is induced by p53 under hypoxia, and its knockdown promotes tumor growth. *Cancer Cell* 6, 597–609 (2004).
18. Duriez, C. et al. The human BTG2/TIS21/PC3 gene: genomic structure, transcriptional regulation and evaluation as a candidate tumor suppressor gene. *Gene* 282, 207–214 (2002).
19. Jen, K.-Y. & Cheung, V. G. Identification of novel p53 target genes in ionizing radiation response. *Cancer Res* 65, 7666–7673 (2005).
20. Saigusa, K. et al. RGC32, a novel p53-inducible gene, is located on centrosomes during mitosis and results in G2/M arrest. *Oncogene* 26, 1110–1121 (2007).
21. Gupta, S., Radha, V., Furukawa, Y. & Swarup, G. Direct transcriptional activation of human caspase-1 by tumor suppressor p53. *J Biol Chem* 276, 10585–10588 (2001).
22. Rikhof, B., Corn, P. G. & El-Deiry, W. S. Caspase 10 levels are increased following DNA damage in a p53-dependent manner. *Cancer Biol Ther* 2, 707–712 (2003).
23. MacLachlan, T. K. & El-Deiry, W. S. Apoptotic threshold is lowered by p53 transactivation of caspase-6. *Proc Natl Acad Sci U S A* 99, 9492–9497 (2002).
24. Bist, A., Fielding, C. J. & Fielding, P. E. p53 regulates caveolin gene transcription, cell cholesterol, and growth by a novel mechanism. *Biochemistry* 39, 1966–1972 (2000).
25. Endo, Y., Fujita, T., Tamura, K., Tsuruga, H. & Nojima, H. Structure and chromosomal assignment of the human cyclin G gene. *Genomics* 38, 92–95 (1996).
26. Mori, T. et al. Cyclin K as a Direct Transcriptional Target of the p53 Tumor Suppressor. *Neoplasia* 4, 268–274 (2002).
27. Mashimo, T. et al. The expression of the KAI1 gene, a tumor metastasis suppressor, is directly activated by p53. *Proc Natl Acad Sci U S A* 95, 11307–11311 (1998).
28. Clair, S. S. et al. DNA damage-induced downregulation of Cdc25C is mediated by p53 via two independent mechanisms: one involves direct binding to the cdc25C promoter. *Mol Cell* 16, 725–736 (2004).
29. el Deiry, W. S. et al. Topological control of p21WAF1/CIP1 expression in normal and neoplastic tissues. *Cancer Res* 55, 2910–2919 (1995).
30. Saramki, A., Banwell, C. M., Campbell, M. J. & Carlberg, C. Regulation of the human p21(waf1/cip1) gene promoter via multiple binding sites for p53 and the vitamin D3 receptor. *Nucleic Acids Res* 34, 543–554 (2006).
31. Yu, X. & Levine, A. J. p53 regulation of the genes in the endosome compartment and autophagy. 2007.

32. Wu, G. S., Saftig, P., Peters, C. & El-Deiry, W. S. Potential role for cathepsin D in p53-dependent tumor suppression and chemosensitivity. *Oncogene* 16, 2177–2183 (1998).
33. Shiraishi, K. *et al.* Identification of fractalkine, a CX3C-type chemokine, as a direct target of p53. *Cancer Res* 60, 3722–3726 (2000).
34. Tan, T. & Chu, G. p53 Binds and activates the xeroderma pigmentosum DDB2 gene in humans but not mice. *Mol Cell Biol* 22, 3247–3254 (2002).
35. Ellisen, L. W. *et al.* REDD1, a developmentally regulated transcriptional target of p63 and p53, links p63 to regulation of reactive oxygen species. *Mol Cell* 10, 995–1005 (2002).
36. Sakuma, S. *et al.* Receptor protein tyrosine kinase DDR is up-regulated by p53 protein. *FEBS Lett* 398, 165–169 (1996).
37. Shou, J. *et al.* Human Dkk-1, a gene encoding a Wnt antagonist, responds to DNA damage and its overexpression sensitizes brain tumor cells to apoptosis following alkylation damage of DNA. *Oncogene* 21, 878–889 (2002).
38. Peterson, E. J., Bgler, O. & Taylor, S. M. p53-mediated repression of DNA methyltransferase 1 expression by specific DNA binding. *Cancer Res* 63, 6579–6582 (2003).
39. Li, M., Zhou, J.-Y., Ge, Y., Matherly, L. H. & Wu, G. S. The phosphatase MKP1 is a transcriptional target of p53 involved in cell cycle regulation. *J Biol Chem* 278, 41059–41068 (2003).
40. Ueda, K., Arakawa, H. & Nakamura, Y. Dual-specificity phosphatase 5 (DUSP5) as a direct transcriptional target of tumor suppressor p53. *Oncogene* 22, 5586–5591 (2003).
41. Hearnes, J. M. *et al.* Chromatin immunoprecipitation-based screen to identify functional genomic binding sites for sequence-specific transactivators. *Mol Cell Biol* 25, 10148–10158 (2005).
42. Kato, M. V., Sato, H., Nagayoshi, M. & Ikawa, Y. Upregulation of the elongation factor-1alpha gene by p53 in association with death of an erythroleukemic cell line. *Blood* 90, 1373–1378 (1997).
43. Ludes-Meyers, J. H. *et al.* Transcriptional activation of the human epidermal growth factor receptor promoter by human p53. *Mol Cell Biol* 16, 6009–6019 (1996).
44. Dohn, M., Jiang, J. & Chen, X. Receptor tyrosine kinase EphA2 is regulated by p53-family proteins and induces apoptosis. *Oncogene* 20, 6503–6515 (2001).
45. Liebetrau, W., Budde, A., Savoia, A., Grummt, F. & Hoehn, H. p53 activates Fanconi anemia group C gene expression. *Hum Mol Genet* 6, 277–283 (1997).
46. Miller, M. *et al.* p53 activates the CD95 (APO-1/Fas) gene in response to DNA damage by anticancer drugs. *J Exp Med* 188, 2033–2045 (1998).
47. Liu, G. & Chen, X. The ferredoxin reductase gene is regulated by the p53 family and sensitizes cells to oxidative stress-induced apoptosis. *Oncogene* 21, 7195–7204 (2002).
48. Smith, M. L. *et al.* Interaction of the p53-regulated protein Gadd45 with proliferating cell nuclear antigen. *Science* 266, 1376–1380 (1994).
49. Tan, M., Wang, Y., Guan, K. & Sun, Y. PTGF-beta, a type beta transforming growth factor (TGF-beta) superfamily member, is a p53 target gene that inhibits tumor cell growth via TGF-beta signaling pathway. *Proc Natl Acad Sci U S A* 97, 109–114 (2000).
50. Kannan, K., Amariglio, N., Rechavi, G. & Givol, D. Profile of gene expression regulated by induced p53: connection to the TGF-beta family. *FEBS Lett* 470, 77–82 (2000).
51. Kimura, Y. *et al.* Genomic structure and chromosomal localization of GML (GPI-anchored molecule-like protein), a gene induced by p53. *Genomics* 41, 477–480 (1997).
52. Ori, A. *et al.* p53 binds and represses the HBV enhancer: an adjacent enhancer element can reverse the transcription effect of p53. *EMBO J* 17, 544–553 (1998).
53. Feng, Z. *et al.* p53 tumor suppressor protein regulates the levels of huntingtin gene expression. *Oncogene* 25, 1–7 (2006).
54. Metcalfe, A. M., Dixon, R. M. & Radda, G. K. Wild-type but not mutant p53 activates the hepatocyte growth factor/scatter factor promoter. *Nucleic Acids Res* 25, 983–986 (1997).
55. Britschgi, C. *et al.* Identification of the p53 family-responsive element in the promoter region of the tumor suppressor gene hypermethylated in cancer 1. *Oncogene* 25, 2030–2039 (2006).
56. Deguin-Chambon, V., Vacher, M., Jullien, M., May, E. & Bourdon, J. C. Direct transactivation of c-Ha-Ras gene by p53: evidence for its involvement in p53 transactivation activity and p53-mediated apoptosis. *Oncogene* 19, 5831–5841 (2000).
57. Zhang, Y. *et al.* Repression of hsp90beta gene by p53 in UV irradiation induced apoptosis of Jurkat cells. *J Biol Chem* 279, 42545–42551 (2004).
58. Ng, C.-C., Arakawa, H., Fukuda, S., Kondoh, H. & Nakamura, Y. p53RFP, a p53-inducible RING-finger protein, regulates the stability of p21WAF1. *Oncogene* 22, 4449–4458 (2003).
59. Im, H.-J., Pittelkow, M. R. & Kumar, R. Divergent regulation of the growth-promoting gene IEX-1 by the p53 tumor suppressor and Sp1. *J Biol Chem* 277, 14612–14621 (2002).
60. Buckbinder, L. *et al.* Induction of the growth inhibitor IGF-binding protein 3 by p53. *Nature* 377, 646–649 (1995).
61. Mori, T. *et al.* Identification of the interferon regulatory factor 5 gene (IRF-5) as a direct target for p53. *Oncogene* 21, 2914–2918 (2002).
62. Mukhopadhyay, T. & Roth, J. A. p53 involvement in activation of the cytokeratin 8 gene in tumor cell lines. *Anticancer Res* 16, 105–112 (1996).

63. Raimond, J., Rouleux, F., Monsigny, M. & Legrand, A. The second intron of the human galectin-3 gene has a strong promoter activity down-regulated by p53. *FEBS Lett* 363, 165–169 (1995).
64. Hu, W., Feng, Z., Teresky, A. & Levine, A. J. p53 regulates maternal reproduction through LIF. *Nature* 450, 721–724 (2007).
65. Lin, Y., Ma, W. & Benchimol, S. Pidd, a new death-domain-containing protein, is induced by p53 and promotes apoptosis. *Nat Genet* 26, 122–127 (2000).
66. Chun, A. C. S. & Jin, D.-Y. Transcriptional regulation of mitotic checkpoint gene MAD1 by p53. *J Biol Chem* 278, 37439–37450 (2003).
67. Zauberman, A., Flusberg, D., Haupt, Y., Barak, Y. & Oren, M. A functional p53-responsive intronic promoter is contained within the human mdm2 gene. *Nucleic Acids Res* 23, 2584–2592 (1995).
68. Seol, D. W., Chen, Q., Smith, M. L. & Zarnegar, R. Regulation of the c-met proto-oncogene promoter by p53. *J Biol Chem* 274, 3565–3572 (1999).
69. Chen, J. & Sadowski, I. Identification of the mismatch repair genes PMS2 and MLH1 as p53 target genes by using serial analysis of binding elements. *Proc Natl Acad Sci U S A* 102, 4813–4818 (2005).
70. Bian, J. & Sun, Y. Transcriptional activation by p53 of the human type IV collagenase (gelatinase A or matrix metalloproteinase 2) promoter. *Mol Cell Biol* 17, 6330–6338 (1997).
71. Warnick, C. T., Dabbas, B., Ford, C. D. & Strait, K. A. Identification of a p53 response element in the promoter region of the hMSH2 gene required for expression in A2780 ovarian cancer cells. *J Biol Chem* 276, 27363–27370 (2001).
72. Scherer, S. J. et al. p53 and c-Jun functionally synergize in the regulation of the DNA repair gene hMSH2 in response to UV. *J Biol Chem* 275, 37469–37473 (2000).
73. Stein, S. et al. NDRG1 is necessary for p53-dependent apoptosis. *J Biol Chem* 279, 48930–48940 (2004).
74. Sadasivam, S. et al. Caspase-1 activator Ipaf is a p53-inducible gene involved in apoptosis. *Oncogene* 24, 627–636 (2005).
75. Mortensen, K., Skouv, J., Hougaard, D. M. & Larsson, L. I. Endogenous endothelial cell nitric-oxide synthase modulates apoptosis in cultured breast cancer cells and is transcriptionally regulated by p53. *J Biol Chem* 274, 37679–37684 (1999).
76. Urano, T. et al. Cloning of P2XM, a novel human P2X receptor gene regulated by p53. *Cancer Res* 57, 3281–3287 (1997).
77. Oda, K. et al. p53AIP1, a potential mediator of p53-dependent apoptosis, and its regulation by Ser-46-phosphorylated p53. *Cell* 102, 849–862 (2000).
78. Zhu, J. & Chen, X. MCG10, a novel p53 target gene that encodes a KH domain RNA-binding protein, is capable of inducing apoptosis and cell cycle arrest in G(2)-M. *Mol Cell Biol* 20, 5602–5618 (2000).
79. Morris, G. F., Bischoff, J. R. & Mathews, M. B. Transcriptional activation of the human proliferating-cell nuclear antigen promoter by p53. *Proc Natl Acad Sci U S A* 93, 895–899 (1996).
80. Reczek, E. E., Flores, E. R., Tsay, A. S., Attardi, L. D. & Jacks, T. Multiple response elements and differential p53 binding control Perp expression during apoptosis. *Mol Cancer Res* 1, 1048–1057 (2003).
81. Rozenfeld-Granot, G. et al. A positive feedback mechanism in the transcriptional activation of Apaf-1 by p53 and the coactivator Zac-1. *Oncogene* 21, 1469–1476 (2002).
82. Burns, T. F., Fei, P., Scata, K. A., Dicker, D. T. & El-Deiry, W. S. Silencing of the novel p53 target gene Snk/Plk2 leads to mitotic catastrophe in paclitaxel (taxol)-exposed cells. *Mol Cell Biol* 23, 5556–5571 (2003).
83. de Stanchina, E. et al. PML is a direct p53 target that modulates p53 effector functions. *Mol Cell* 13, 523–535 (2004).
84. Yan, J. et al. BLIMP1 regulates cell growth through repression of p53 transcription. *Proc Natl Acad Sci U S A* 104, 1841–1846 (2007).
85. Stambolic, V. et al. Regulation of PTEN transcription by p53. *Mol Cell* 8, 317–325 (2001).
86. Golubovskaya, V., Kaur, A. & Cance, W. Cloning and characterization of the promoter region of human focal adhesion kinase gene: nuclear factor kappa B and p53 binding sites. *Biochim Biophys Acta* 1678, 111–125 (2004).
87. Ohtsuka, T. et al. ASC is a Bax adaptor and regulates the p53-Bax mitochondrial apoptosis pathway. *Nat Cell Biol* 6, 121–128 (2004).
88. Shiio, Y., Yamamoto, T. & Yamaguchi, N. Negative regulation of Rb expression by the p53 gene product. *Proc Natl Acad Sci U S A* 89, 5206–5210 (1992).
89. Dornan, D. et al. The ubiquitin ligase COP1 is a critical negative regulator of p53. *Nature* 429, 86–92 (2004).
90. Tanaka, H. et al. A ribonucleotide reductase gene involved in a p53-dependent cell-cycle checkpoint for DNA damage. *Nature* 404, 42–49 (2000).
91. Tan, M., Heizmann, C. W., Guan, K., Schafer, B. W. & Sun, Y. Transcriptional activation of the human S100A2 promoter by wild-type p53. *FEBS Lett* 445, 265–268 (1999).
92. Han, H. J., Tokino, T. & Nakamura, Y. CSR, a scavenger receptor-like protein with a protective role against cellular damage caused by UV irradiation and oxidative stress. *Hum Mol Genet* 7, 1039–1046 (1998).
93. Adachi, K. et al. Identification of SCN3B as a novel p53-inducible proapoptotic gene. *Oncogene* 23, 7791–7798 (2004).
94. Zou, Z. et al. p53 regulates the expression of the tumor suppressor gene maspin. *J Biol Chem* 275, 6051–6054 (2000).



95. Kunz, C., Pebler, S., Otte, J. & von der Ahe, D. Differential regulation of plasminogen activator and inhibitor gene transcription by the tumor suppressor p53. *Nucleic Acids Res* 23, 3710–3717 (1995).
96. Velasco-Miguel, S. et al. PA26, a novel target of the p53 tumor suppressor and member of the GADD family of DNA damage and growth arrest inducible genes. *Oncogene* 18, 127–137 (1999).
97. Hermeking, H. et al. 14-3-3 sigma is a p53-regulated inhibitor of G2/M progression. *Mol Cell* 1, 3–11 (1997).
98. Nagy, N. et al. Wild-type p53 activates SAP expression in lymphoid cells. *Oncogene* 23, 8563–8570 (2004).
99. Passer, B. J. et al. The p53-inducible TSAP6 gene product regulates apoptosis and the cell cycle and interacts with Nix and the Myt1 kinase. *Proc Natl Acad Sci U S A* 100, 2284–2289 (2003).
100. Herzer, K. et al. Upregulation of major histocompatibility complex class I on liver cells by hepatitis C virus core protein via p53 and TAP1 impairs natural killer cell cytotoxicity. *J Virol* 77, 8299–8309 (2003).
101. Shin, T. H., Paterson, A. J. & Kudlow, J. E. p53 stimulates transcription from the human transforming growth factor alpha promoter: a potential growth-stimulatory role for p53. *Mol Cell Biol* 15, 4694–4701 (1995).
102. Liu, X., Yue, P., Khuri, F. R. & Sun, S.-Y. p53 upregulates death receptor 4 expression through an intronic p53 binding site. *Cancer Res* 64, 5078–5083 (2004). URL
103. Takimoto, R. & El-Deiry, W. S. Wild-type p53 transactivates the KILLER/DR5 gene through an intronic sequence-specific DNA-binding site. *Oncogene* 19, 1735–1743 (2000).
104. Liu, X., Yue, P., Khuri, F. R. & Sun, S.-Y. Decoy receptor 2 (DcR2) is a p53 target gene and regulates chemosensitivity. *Cancer Res* 65, 9169–9175 (2005).
105. Benoit, V. et al. Additive effect between NF-kappaB subunits and p53 protein for transcriptional activation of human p53 promoter. *Oncogene* 19, 4787–4794 (2000).
106. Contente, A., Dittmer, A., Koch, M. C., Roth, J. & Dobbstein, M. A polymorphic microsatellite that mediates induction of PIG3 by p53. *Nat Genet* 30, 315–320 (2002).
107. Okamura, S. et al. p53DINP1, a p53-inducible gene, regulates p53-dependent apoptosis. *Mol Cell* 8, 85–94 (2001).
108. Harmes, D. C. et al. Positive and negative regulation of deltaN-p63 promoter activity by p53 and deltaN-p63-alpha contributes to differential regulation of p53 target genes. *Oncogene* 22, 7607–7616 (2003).
109. Chen, X., Zheng, Y., Zhu, J., Jiang, J. & Wang, J. p73 is transcriptionally regulated by DNA damage, p53, and p73. *Oncogene* 20, 769–774 (2001).
110. Nakagawa, T. et al. Autoinhibitory regulation of p73 by Delta Np73 to modulate cell survival and death through a p73-specific target element within the Delta Np73 promoter. *Mol Cell Biol* 22, 2575–2585 (2002).
111. Park, W.-R. & Nakamura, Y. p53CSV, a novel p53-inducible gene involved in the p53-dependent cell-survival pathway. *Cancer Res* 65, 1197–1206 (2005).
112. Obad, S. et al. Staf50 is a novel p53 target gene conferring reduced clonogenic growth of leukemic U-937 cells. *Oncogene* 23, 4050–4059 (2004).
113. Feng, Z. et al. The regulation of AMPK beta1, TSC2, and PTEN expression by p53: stress, cell and tissue specificity, and the role of these gene products in modulating the IGF-1-AKT-mTOR pathways. *Cancer Res* 67, 3043–3053 (2007).
114. Nylander, K. et al. Transcriptional activation of tyrosinase and TRP-1 by p53 links UV irradiation to the protective tanning response. *J Pathol* 190, 39–46 (2000).
115. Zhang, D. W., Jeang, K.-T. & Lee, C. G. L. p53 negatively regulates the expression of FAT10, a gene upregulated in various cancers. *Oncogene* 25, 2318–2327 (2006).
116. Yoon, H. et al. Gene expression profiling of isogenic cells with different TP53 gene dosage reveals numerous genes that are affected by TP53 dosage and identifies CSPG2 as a direct target of p53. *Proc Natl Acad Sci U S A* 99, 15632–15637 (2002).
117. Maruyama, R. et al. Comparative genome analysis identifies the vitamin D receptor gene as a direct target of p53-mediated transcriptional activation. *Cancer Res* 66, 4574–4583 (2006).
