# Supplementary material for: Transcriptional control of human p53-regulated genes
Source: Springer Nature journal article supplement (doi:10.1038/nrm2395), 2008-04-23
Supplement: 41580_2008_BFnrm2395_MOESM82_ESM.pdf [file 41580_2008_BFnrm2395_MOESM82_ESM.pdf]

**Supplementary information S2 (table) | Description of genes regulated by p53 (part II)\***

| #  | Gene Name(s)    | Location                 | Type      | bp from TSS      | Function | PHMM Score | Refs |
|----|-----------------|--------------------------|-----------|------------------|----------|------------|------|
| 1  | ABCB1, MDR1     | Promoter                 | repressor | -89 to -57bp     |          | 63.34      | 1    |
| 2  | ACTA2           | Promoter                 | activator | -330 to -311bp   | CytoS    | 67.61      | 2    |
| 3  | AIFM2, AMID     | Promoter                 | activator | -596 to -567bp   | A        | 81.34      | 3    |
| 3  | AIFM2, AMID     | Promoter                 | activator | -682 to -654bp   | A        | 66.15      | 3    |
| 4  | ANLN            | Promoter                 | repressor | -866 to -841bp   | CytoS    | 73.89      | 4    |
| 5  | APAF1           | Promoter                 | activator | -603 to -571bp   | A        | 90.33      | 5    |
| 6  | APC             | Promoter                 | both      | -230 to -198bp   | R-       | 74.23      | 6    |
| 7  | ARID3A, E2FBP1  | Intron 2                 | activator | 4240 to 4259bp   | C        | 83.53      | 7    |
| 8  | ATF3            | Promoter                 | activator | -388 to -352bp   | T        | 80.67      | 8    |
| 9  | BAI1            | Intron 9                 | activator | 17444 to 17462bp | ECM      | 79.09      | 9    |
| 10 | BAX             | Intron 1                 | activator | 354 to 373bp     | A        | 87.61      | 10   |
| 11 | BBC3, PUMA      | Promoter                 | activator | -145 to -126bp   | A        | 79.34      | 11   |
| 12 | BCL2L14, BCL-G  | 5'-UTR, Intron 1         | activator | 1612 to 1631bp   | A        | 64.87      | 12   |
| 13 | BCL6            | 5'-UTR, Intron 1         | activator | 696 to 728bp     | -F       | 78.49      | 13   |
| 14 | BDKRB2, BK2     | Promoter                 | activator | -86 to -67bp     | CytoR    | 45.12      | 14   |
| 15 | BID             | Intron 1                 | activator | 17277 to 17296bp | A        | 80.44      | 15   |
| 16 | BIRC5, survivin | 5'-UTR, Exon 1           | repressor | 34 to 56bp       | A        | 81.44      | 16   |
| 17 | BNIP3L          | Downstream (4476)        | activator | 34574 to 34598bp | A        | 85         | 17   |
| 18 | BTG2, TIS21     | Promoter                 | activator | -25 to -5bp      | C, DNA-R | 42.33      | 18   |
| 19 | C12orf5         | Intron 1                 | activator | 411 to 432bp     | ?        | 93.39      | 19   |
| 20 | C13orf15, RGC32 | Intron 2                 | activator | 1116 to 1138bp   | C        | 76.75      | 20   |
| 21 | CASP1           | Promoter                 | activator | -99 to -79bp     | CytoR    | 79.94      | 21   |
| 22 | CASP10          | Promoter                 | activator | -1082 to -1058bp |          | 70.01      | 22   |
| 23 | CASP6           | Intron 3                 | activator | 5974 to 5997bp   | A        | 76.81      | 23   |
| 24 | CAV1            | Promoter, 5'-UTR, Exon 1 | activator | -17 to 13bp      | E,C      | 52.91      | 24   |
| 25 | CCNG1           | 5'-UTR, Intron 1         | activator | 356 to 375bp     | C        | 86.92      | 25   |
| 26 | CCNK            | 5'-UTR, Intron 1         | activator | 2887 to 2908bp   | C        | 81.53      | 26   |
| 27 | CD82, KAI1      | Promoter                 | activator | -886 to -862bp   | ECM      | 77.17      | 27   |
| 28 | CDC25C          | Promoter                 | repressor | -155 to -125bp   | C        | 87.3       | 28   |
| 29 | CDKN1A, p21     | Promoter                 | activator | -1373 to -1354bp | C, S     | 49         | 29   |
| 29 | CDKN1A, p21     | Promoter                 | activator | -1378 to -1359bp | C, S     | 70.59      | 30   |
| 29 | CDKN1A, p21     | Promoter                 | activator | -2260 to -2241bp | C, S     | 82.92      | 30   |
| 30 | Chmp4C          | Promoter                 | activator | -497 to -460bp   | E        | 90.68      | 31   |

|    |                     |                          |           |                    |          |       |    |
|----|---------------------|--------------------------|-----------|--------------------|----------|-------|----|
| 31 | COL18A1             | Promoter                 | activator | -2836 to -2817bp   | ECM      | 77.62 | 12 |
| 31 | COL18A1             | Promoter                 | activator | -2360 to -2341bp   | ECM      | 77.62 | 12 |
| 32 | CRYZ                | 5'-UTR, Intron 1         | repressor | 7721 to 7743bp     | ?        | 74.99 | 4  |
| 33 | CTSD, IRDD          | Promoter                 | activator | -373 to -352bp     | A        | 53.25 | 32 |
| 33 | CTSD, IRDD          | Promoter                 | activator | -144 to -125bp     | A        | 66.26 | 32 |
| 34 | CX3CL1, fractalkine | Promoter                 | activator | -279 to -259bp     | CytoR    | 78.38 | 33 |
| 35 | DDB2                | 5'-UTR, Exon 1           | activator | 18 to 38bp         | DNA-R    | 92.09 | 34 |
| 36 | DDIT4, REDD1        | Promoter                 | activator | -302 to -283bp     | DNA-R    | 66.03 | 35 |
| 37 | DDR1                | Promoter                 | activator | -1494 to -1475bp   | GR, R+   | 74.81 | 36 |
| 38 | DKK1                | Promoter                 | activator | -2136 to -2111bp   | A        | 75.34 | 37 |
| 39 | DNMT1               | 5'-UTR, Exon 1           | repressor | 29 to 55bp         | ?        | 82.01 | 38 |
| 40 | DUSP1, MKP1         | Intron 2                 | activator | 1235 to 1255bp     | C, A     | 63.61 | 39 |
| 41 | DUSP5               | Promoter                 | activator | -1127 to -1107bp   | C, CytoS | 69.28 | 40 |
| 42 | EDN2                | Intron 3                 | activator | 2197 to 2216bp     | ?        | 88.14 | 41 |
| 43 | EEF1A1              | Exon 4, CDS              | activator | 1869 to 1890bp     | CytoS, A | 81.43 | 42 |
| 43 | EEF1A1              | Exon 2, CDS              | activator | 1044 to 1067bp     | CytoS, A | 78.98 | 42 |
| 43 | EEF1A1              | Exon 3, CDS              | activator | 1670 to 1691bp     | CytoS, A | 61.94 | 42 |
| 44 | EGFR                | Promoter, 5'-UTR, Exon 1 | activator | -19 to 3bp         | C, R+    | 72.16 | 43 |
| 45 | EphA2               | Promoter                 | activator | -1541 to -1519bp   | A        | 78.25 | 44 |
| 46 | FANCC, FAC          | Promoter                 | activator | -1286 to -1257bp   | A, DNA-R | 71.11 | 45 |
| 47 | FAS, CD95           | Intron 1                 | activator | 779 to 798bp       | A        | 84.08 | 46 |
| 48 | FDXR                | Promoter                 | activator | -43 to -24bp       |          | 80.48 | 47 |
| 49 | GADD45A             | Intron 3                 | activator | 1576 to 1595bp     | DNA-R    | 86.2  | 48 |
| 50 | GDF15, MIC-1        | 5'-UTR, Exon 1, CDS      | activator | 12 to 31bp         | A        | 79.68 | 49 |
| 50 | GDF15, MIC-1        | Promoter                 | activator | -866 to -847bp     | A        | 80.39 | 50 |
| 51 | GML                 | Promoter                 | activator | -18969 to -18950bp | C        | 90.16 | 51 |
| 52 | GPX1                | Promoter                 | activator | -182 to -163bp     | DNA-R    | 83.67 | 19 |
| 53 | HBV                 |                          | repressor |                    |          | 69.91 | 52 |
| 54 | HD, Huntington      | Intron 2                 | activator | 15233 to 15259bp   | CNS      | 78.76 | 53 |
| 54 | HD, Huntington      | Promoter                 | activator | -1855 to -1833bp   | CNS      | 72.93 | 53 |
| 54 | HD, Huntington      | Intron 3                 | activator | 25968 to 25993bp   | CNS      | 83.11 | 53 |
| 55 | HGF, SF             | Promoter                 | activator | -324 to -305bp     | C, R+    | 59.08 | 54 |
| 56 | HIC1                | 5'-UTR, Intron 1         | activator | 555 to 576bp       | F        | 67.63 | 55 |
| 57 | HRAS, c-Ha-Ras      | 5'-UTR, Intron 1         | activator | 735 to 851bp       | C        | 79.63 | 56 |
| 58 | HSP90AB1, hsp90beta | 5'-UTR, Exon 1           | repressor | 16 to 45bp         | HSP      | 80.95 | 57 |
| 59 | HSPA8               | 5'-UTR, Intron 1         | repressor | 648 to 675bp       | HSP      | 70.91 | 4  |

|    |                    |                   |           |                  |          |       |    |
|----|--------------------|-------------------|-----------|------------------|----------|-------|----|
| 60 | IBRDC2, p53RFP     | Promoter          | activator | -168 to -149bp   | C        | 74.51 | 58 |
| 61 | IER3, IEX-1        | Promoter          | repressor | -247 to -226bp   | A        | 77.27 | 59 |
| 62 | IGFBP3             |                   | activator |                  |          |       | 60 |
| 62 | IGFBP3             | Intron 2          | activator | 4090 to 4109bp   | R-       | 77.64 | 60 |
| 62 | IGFBP3             | Intron 1          | activator | 3170 to 3190bp   | R-       | 78.69 | 60 |
| 63 | IRF5               | Exon 2, CDS       | activator | 4007 to 4028bp   | CytoR    | 84.55 | 61 |
| 64 | KRT8, CK8          | 5'-UTR, Exon 1    | activator | 30 to 51bp       | CytoS    | 63.36 | 62 |
| 65 | LGALS3, galectin-3 | Intron 2          | repressor | 8239 to 8263bp   | A        | 74.97 | 63 |
| 66 | LIF                | Intron 1          | activator | 873 to 891bp     | CytoR    | 80.9  | 64 |
| 67 | LRDD, PIDD         | 5'-UTR, Exon 2    | activator | 804 to 831bp     | A        | 90.45 | 65 |
| 68 | MAD1L1, MAD1       | Promoter          | repressor | -316 to -297bp   | C        | 47.36 | 66 |
| 69 | mdm2               | 5'-UTR, Intron 1  | activator | 762 to 781bp     | F-       | 70.03 | 67 |
| 69 | mdm2               | 5'-UTR, Intron 1  | activator | 724 to 743bp     | F-       | 77.32 | 67 |
| 70 | MET                | Promoter          | activator | -232 to -199bp   | C, R+    | 67.42 | 68 |
| 71 | MLH1               | Intron 1          | activator | 269 to 289bp     | DNA-R    | 87.36 | 69 |
| 72 | MMP2               | Promoter          | activator | -1645 to -1626bp | EMC      | 89.83 | 70 |
| 73 | MSH2               | Promoter          | activator | -173 to -153bp   | DNA-R    | 71.85 | 71 |
| 73 | MSH2               | Promoter          | activator | -378 to -346bp   | DNA-R    | 68.75 | 72 |
| 74 | NDRG1              | Promoter          | activator | -373 to -342bp   | A        | 65.88 | 73 |
| 75 | NLRC4, Ipaf        | Promoter          | activator | -169 to -150bp   | A        | 67.51 | 74 |
| 76 | NOS3               | 5'-UTR, Intron 1  | repressor | 2575 to 2597bp   | CytoR    | 72.37 | 75 |
| 77 | ODC1               | Promoter          | repressor | -334 to -310bp   | C        | 73.5  | 4  |
| 77 | ODC1               | 5'-UTR, Intron 1  | repressor | 585 to 614bp     | C        | 73.55 | 4  |
| 78 | P2RXL1             | Downstream (1631) | activator | 15281 to 15302bp | CNS      | 78.99 | 76 |
| 79 | P53AIP1            | 5'-UTR, Intron 1  | activator | 2002 to 2021bp   | A        | 73.6  | 77 |
| 80 | PCBP4, MCG10       | Promoter          | activator | -891 to -870bp   | A        | 70.04 | 78 |
| 80 | PCBP4, MCG10       | Promoter          | activator | -1852 to -1824bp | A        | 63.97 | 78 |
| 81 | PCNA               | 5'-UTR, Intron 1  | activator | 6428 to 6447bp   | C, DNA-R | 77.17 | 79 |
| 82 | PERP               | Intron 1          | activator | 3361 to 3380bp   | A        | 84    | 80 |
| 83 | PLAGL1, ZAC        | Promoter          | activator | -861 to -842bp   | C, F-    | 73.58 | 81 |
| 84 | PLK2, SNK          | Promoter          | activator | -2258 to -2236bp | C        | 75.96 | 82 |
| 84 | PLK2, SNK          | Promoter          | activator | -1303 to -1281bp | C        | 73.01 | 82 |
| 84 | PLK2, SNK          | Promoter          | repressor | -2033 to -2014bp | C        | 93.13 | 82 |
| 85 | PLK3               | Promoter          | activator | -439 to -414bp   | C        | 73.15 | 19 |
| 86 | PML                | Intron 1          | activator | 643 to 670bp     | T, S, A  | 85.42 | 83 |
| 87 | PMS2               | Intron 1          | activator | 2977 to 2998bp   | DNA-R    | 50.66 | 69 |

|     |                   |                          |           |                  |                    |       |     |
|-----|-------------------|--------------------------|-----------|------------------|--------------------|-------|-----|
| 88  | PPM1J, MGC19531   | Downstream (6082)        | activator | 11355 to 11374bp | ?                  | 92.48 | 41  |
| 89  | PRDM1, BLIMP1     | Promoter                 | activator | -356 to -337bp   | CytoR              | 87.21 | 84  |
| 90  | PRKAB1, AMPKbeta1 | 5'-UTR, Exon 1           | activator | 65 to 84bp       | F-                 | 74.37 | 19  |
| 91  | PTEN              | Promoter                 | activator | -117 to -84bp    | A                  | 93.98 | 85  |
| 92  | PTK2, FAK         | Promoter                 | repressor | -968 to -960bp   | C, R               | -18.5 | 86  |
| 93  | PYCARD, ASC       | Promoter                 | activator | -80 to -59bp     | A                  | 79.38 | 87  |
| 94  | RABGGTA           | 5'-UTR, Exon 1           | activator | 226 to 253bp     | ?                  | 66.72 | 19  |
| 95  | RB1               | 5'-UTR, Exon 1           | activator | 59 to 82bp       | C                  | 73.47 | 88  |
| 96  | RFWD2, COP1       | Promoter                 | activator | -2198 to -2177bp | F-                 | 75.83 | 89  |
| 97  | RPS27L            | Intron 1                 | activator | 223 to 242bp     | ?                  | 81.59 | 41  |
| 98  | RRM2B, p53R2      | Intron 1                 | activator | 2259 to 2278bp   | DNA-R              | 91.36 | 90  |
| 99  | S100A2            | Promoter                 | activator | -1850 to -1831bp | C                  | 82.35 | 91  |
| 100 | SCARA3, CSR1      | Intron 2                 | unknown   | 17074 to 17093bp | DNA-R              | 87.81 | 92  |
| 101 | SCD               | Promoter                 | repressor | -199 to -179bp   | ECM                | 78.12 | 4   |
| 102 | SCN3B             | Promoter                 | activator | -9137 to -9118bp | A                  | 75.77 | 93  |
| 102 | SCN3B             | Intron 3                 | activator | 13595 to 13614bp | A                  | 77.54 | 93  |
| 103 | SERPINB5, maspin  | Promoter                 | activator | -224 to -204bp   | ECM                | 64.63 | 94  |
| 104 | SERPINE1          | Promoter                 | activator | -226 to -207bp   | ECM                | 82.89 | 95  |
| 105 | SESN1, PA26       | Intron 1                 | activator | 511 to 530bp     | C, S               | 77.67 | 96  |
| 106 | SFN, 14-3-3sigma  | Promoter                 | activator | -1812 to -1792bp | C                  | 77.49 | 97  |
| 107 | SH2D1A, SAP       | Promoter                 | activator | -1884 to -1860bp | C, CytoR           | 70.91 | 98  |
| 107 | SH2D1A, SAP       | Promoter                 | activator | -1894 to -1876bp | C, CytoR           | 72.95 | 98  |
| 107 | SH2D1A, SAP       | Promoter                 | activator | -1909 to -1885bp | C, CytoR           | 66.65 | 98  |
| 108 | SLC38A2           | Downstream (532)         | repressor | 15079 to 15108bp | ?                  | 75.78 | 4   |
| 109 | STEAP3, TSAP6     | 5'-UTR, Intron 1         | activator | 21225 to 21246bp | ECM, E             | 87.66 | 99  |
| 110 | TAP1              | Exon 1, CDS              | activator | 643 to 668bp     | R                  | 89.35 | 100 |
| 111 | TGFA              | Promoter                 | activator | -84 to -65bp     | C, R               | 77.98 | 101 |
| 112 | TNFRSF10A, DR4    | Intron 1                 | activator | 479 to 498bp     | A                  | 77.36 | 102 |
| 113 | TNFRSF10B, DR5    | Intron 1                 | activator | 538 to 557bp     | A                  | 86.85 | 103 |
| 114 | TNFRSF10C, DcR1   | Intron 1                 | activator | 369 to 388bp     | A                  | 83.07 | 104 |
| 115 | TNFRSF10D, DcR2   | Intron 1                 | activator | 351 to 370bp     | A                  | 82.02 | 104 |
| 116 | TP53, p53         | Promoter, 5'-UTR, Exon 1 | activator | -12 to 7bp       | A, C, S, DNA-R, F+ | 66.94 | 105 |
| 117 | TP53i3, Pig3      | 5'-UTR, Exon 1           | activator | 441 to 515bp     | DNA-R              | 66.29 | 106 |
| 118 | TP53INP1          | Intron 3                 | activator | 10562 to 10581bp | A                  | 73.72 | 107 |
| 119 | TP63, TP73L       | Promoter                 | activator | -756 to -734bp   | R-                 | 76.02 | 108 |
| 120 | TP73, p73         | Promoter                 | activator | -2630 to -2603bp | R-                 | 73.37 | 109 |

|     |                |                  |           |                  |            |       |     |
|-----|----------------|------------------|-----------|------------------|------------|-------|-----|
| 120 | TP73, p73      | Promoter         | activator | -2612 to -2582bp | R-         | 68.78 | 109 |
| 121 | Tp73:Delta     | Promoter         | activator | -75 to -45bp     | R-         | 84.87 | 110 |
| 122 | TRIAP1, p53CSV | Exon 1, CDS      | activator | 56 to 75bp       | A          | 76.63 | 111 |
| 123 | TRIM22, Staf50 | 5'-UTR, Intron 1 | activator | 694 to 713bp     | DNA-R      | 80.91 | 112 |
| 124 | TRPM2          | Promoter         | repressor | -2251 to -2227bp | CNS, C     | 81.77 | 4   |
| 124 | TRPM2          | Promoter         | repressor | -1878 to -1846bp | CNS, C     | 82.07 | 4   |
| 124 | TRPM2          | Promoter         | repressor | -2246 to -2227bp | CNS, C     | 74.96 | 4   |
| 125 | TSC2           | Intron 11        | activator | 13579 to 13599bp | R-         | 84.19 | 113 |
| 125 | TSC2           | Intron 2         | activator | 3921 to 3952bp   | R-         | 71.77 | 113 |
| 125 | TSC2           | Intron 2         | activator | 2579 to 2598bp   | R-         | 80.62 | 113 |
| 126 | TYRP1, TRP-1   | Promoter         | activator | -122 to -100bp   | protective | 59.86 | 114 |
| 126 | TYRP1, TRP-1   | Promoter         | activator | -108 to -77bp    | protective | 54.39 | 114 |
| 126 | TYRP1, TRP-1   | Promoter         | activator | -75 to -56bp     | protective | 61.9  | 114 |
| 126 | TYRP1, TRP-1   | Promoter         | activator | -134 to -113bp   | protective | 73.8  | 114 |
| 126 | TYRP1, TRP-1   | Promoter         | activator | -85 to -66bp     | protective | 60.42 | 114 |
| 127 | UBD, FAT10     | Promoter         | repressor | -239 to -220bp   | A          | 59.67 | 115 |
| 128 | VCAN, CSPG2    | 5'-UTR, Intron 1 | activator | 684 to 704bp     | C          | 87.31 | 116 |
| 129 | VDR            | 5'-UTR, Intron 1 | activator | 4720 to 4739bp   | C, A       | 73.09 | 117 |
| 129 | VDR            | 5'-UTR, Intron 1 | activator | 4707 to 4729bp   | C, A       | 55.95 | 117 |

\*This table provides additional information on the gene set found in Supplementary information S1 (table). This table provides the relative locations in the gene, the regulation type, the distances to the transcription start site (TSS), the gene functions, the Profile Hidden Markov Model (PHMM) score and the references. The PHMM scores are normalized by the highest possible score (such that the highest possible score is 100). The HG17 release of the human genome sequence was employed to deduce the distances from the TSS. Functions are as follows: A = apoptosis, C = cell cycle control, S = senescence, CytoS = cytoskeleton, E = endosome and exosome compartment, ECM = extracellular matrix, F+/- = positive/negative feedback loops for p53, R+/- = regulation by p53 upon other signal transduction pathways, T = transcription and translation, DNA-R = DNA repair, CytoR = cytokine and inflammatory regulator, CNS = central nervous system regulator, GR = growth factor regulator, HSP = heat shock protein.

## References

1. Johnson, R. A., Ince, T. A. & Scotto, K. W. Transcriptional repression by p53 through direct binding to a novel DNA element. *J Biol Chem* 276, 27716–27720 (2001).
2. Wang, L. et al. Analyses of p53 Target Genes in the Human Genome by Bioinformatic and Microarray Approaches. *J. Biol. Chem.* 276, 43604–43610 (2001).
3. Wu, M. et al. AMID is a p53-inducible gene downregulated in tumors. *Oncogene* 23, 6815–6819 (2004).
4. Mirza, A. et al. Global transcriptional program of p53 target genes during the process of apoptosis and cell cycle progression. *Oncogene* 22, 3645–3654 (2003).
5. Robles, A. I., Bemmels, N. A., Foraker, A. B. & Harris, C. C. APAF-1 is a transcriptional target of p53 in DNA damage-induced apoptosis. *Cancer Res* 61, 6660–6664 (2001).
6. Jaiswal, A. S. & Narayan, S. p53-dependent transcriptional regulation of the APC promoter in colon cancer cells treated with DNA alkylating agents. *J Biol Chem* 276, 18193–18199 (2001).
7. Ma, K. et al. E2FBP1/DRIL1, an AT-rich interaction domain-family transcription factor, is regulated by p53. *Mol Cancer Res* 1, 438–444 (2003).
8. Zhang, C. et al. Transcriptional activation of the human stress-inducible transcriptional repressor ATF3 gene promoter by p53. *Biochem Biophys Res Commun* 297, 1302–1310 (2002).
9. Soussi, T. p53 alterations in human cancer: more questions than answers. *Oncogene* 26, 2145–2156 (2007).
10. Thornborrow, E. C., Patel, S., Mastropietro, A. E., Schwartzfarb, E. M. & Manfredi, J. J. A conserved intronic response element mediates direct p53-dependent transcriptional activation of both the human and murine bax genes. *Oncogene* 21, 990–999 (2002).
11. Nakano, K. & Vousden, K. H. PUMA, a novel proapoptotic gene, is induced by p53. *Mol Cell* 7, 683–694 (2001).
12. Miled, C., Pontoglio, M., Garbay, S., Yaniv, M. & Weitzman, J. B. A genomic map of p53 binding sites identifies novel p53 targets involved in an apoptotic network. *Cancer Res* 65, 5096–5104 (2005).
13. Margalit, O. et al. BCL6 is regulated by p53 through a response element frequently disrupted in B-cell non-Hodgkin lymphoma. *Blood* 107, 1599–1607 (2006).
14. Saifudeen, Z., Du, H., Dipp, S. & El-Dahr, S. S. The bradykinin type 2 receptor is a target for p53-mediated transcriptional activation. *J Biol Chem* 275, 15557–15562 (2000).
15. Sax, J. K. et al. BID regulation by p53 contributes to chemosensitivity. *Nat Cell Biol* 4, 842–849 (2002).
16. Hoffman, W. H., Biade, S., Zilfou, J. T., Chen, J. & Murphy, M. Transcriptional repression of the anti-apoptotic survivin gene by wild type p53. *J Biol Chem* 277, 3247–3257 (2002).
17. Fei, P. et al. Bnip3L is induced by p53 under hypoxia, and its knockdown promotes tumor growth. *Cancer Cell* 6, 597–609 (2004).
18. Duriez, C. et al. The human BTG2/TIS21/PC3 gene: genomic structure, transcriptional regulation and evaluation as a candidate tumor suppressor gene. *Gene* 282, 207–214 (2002).
19. Jen, K.-Y. & Cheung, V. G. Identification of novel p53 target genes in ionizing radiation response. *Cancer Res* 65, 7666–7673 (2005).
20. Saigusa, K. et al. RGC32, a novel p53-inducible gene, is located on centrosomes during mitosis and results in G2/M arrest. *Oncogene* 26, 1110–1121 (2007).
21. Gupta, S., Radha, V., Furukawa, Y. & Swarup, G. Direct transcriptional activation of human caspase-1 by tumor suppressor p53. *J Biol Chem* 276, 10585–10588 (2001).
22. Rikhof, B., Corn, P. G. & El-Deiry, W. S. Caspase 10 levels are increased following DNA damage in a p53-dependent manner. *Cancer Biol Ther* 2, 707–712 (2003).
23. MacLachlan, T. K. & El-Deiry, W. S. Apoptotic threshold is lowered by p53 transactivation of caspase-6. *Proc Natl Acad Sci U S A* 99, 9492–9497 (2002).
24. Bist, A., Fielding, C. J. & Fielding, P. E. p53 regulates caveolin gene transcription, cell cholesterol, and growth by a novel mechanism. *Biochemistry* 39, 1966–1972 (2000).
25. Endo, Y., Fujita, T., Tamura, K., Tsuruga, H. & Nojima, H. Structure and chromosomal assignment of the human cyclin G gene. *Genomics* 38, 92–95 (1996).
26. Mori, T. et al. Cyclin K as a Direct Transcriptional Target of the p53 Tumor Suppressor. *Neoplasia* 4, 268–274 (2002).
27. Mashimo, T. et al. The expression of the KAI1 gene, a tumor metastasis suppressor, is directly activated by p53. *Proc Natl Acad Sci U S A* 95, 11307–11311 (1998).
28. Clair, S. S. et al. DNA damage-induced downregulation of Cdc25C is mediated by p53 via two independent mechanisms: one involves direct binding to the cdc25C promoter. *Mol Cell* 16, 725–736 (2004).
29. el Deiry, W. S. et al. Topological control of p21WAF1/CIP1 expression in normal and neoplastic tissues. *Cancer Res* 55, 2910–2919 (1995).
30. Saramki, A., Banwell, C. M., Campbell, M. J. & Carlberg, C. Regulation of the human p21(waf1/cip1) gene promoter via multiple binding sites for p53 and the vitamin D3 receptor. *Nucleic Acids Res* 34, 543–554 (2006).
31. Yu, X. & Levine, A. J. p53 regulation of the genes in the endosome compartment and autophagy. 2007.
32. Wu, G. S., Saffig, P., Peters, C. & El-Deiry, W. S. Potential role for cathepsin D in p53-dependent tumor suppression and chemosensitivity. *Oncogene* 16, 2177–2183 (1998).

33. Shiraiishi, K. *et al.* Identification of fractalkine, a CX3C-type chemokine, as a direct target of p53. *Cancer Res* 60, 3722–3726 (2000).
34. Tan, T. & Chu, G. p53 Binds and activates the xeroderma pigmentosum DDB2 gene in humans but not mice. *Mol Cell Biol* 22, 3247–3254 (2002).
35. Ellisen, L. W. *et al.* REDD1, a developmentally regulated transcriptional target of p63 and p53, links p63 to regulation of reactive oxygen species. *Mol Cell* 10, 995–1005 (2002).
36. Sakuma, S. *et al.* Receptor protein tyrosine kinase DDR is up-regulated by p53 protein. *FEBS Lett* 398, 165–169 (1996).
37. Shou, J. *et al.* Human Dkk-1, a gene encoding a Wnt antagonist, responds to DNA damage and its overexpression sensitizes brain tumor cells to apoptosis following alkylation damage of DNA. *Oncogene* 21, 878–889 (2002).
38. Peterson, E. J., Bgler, O. & Taylor, S. M. p53-mediated repression of DNA methyltransferase 1 expression by specific DNA binding. *Cancer Res* 63, 6579–6582 (2003).
39. Li, M., Zhou, J.-Y., Ge, Y., Matherly, L. H. & Wu, G. S. The phosphatase MKP1 is a transcriptional target of p53 involved in cell cycle regulation. *J Biol Chem* 278, 41059–41068 (2003).
40. Ueda, K., Arakawa, H. & Nakamura, Y. Dual-specificity phosphatase 5 (DUSP5) as a direct transcriptional target of tumor suppressor p53. *Oncogene* 22, 5586–5591 (2003).
41. Hearnes, J. M. *et al.* Chromatin immunoprecipitation-based screen to identify functional genomic binding sites for sequence-specific transactivators. *Mol Cell Biol* 25, 10148–10158 (2005).
42. Kato, M. V., Sato, H., Nagayoshi, M. & Ikawa, Y. Upregulation of the elongation factor-1alpha gene by p53 in association with death of an erythroleukemic cell line. *Blood* 90, 1373–1378 (1997).
43. Ludes-Meyers, J. H. *et al.* Transcriptional activation of the human epidermal growth factor receptor promoter by human p53. *Mol Cell Biol* 16, 6009–6019 (1996).
44. Dohn, M., Jiang, J. & Chen, X. Receptor tyrosine kinase EphA2 is regulated by p53-family proteins and induces apoptosis. *Oncogene* 20, 6503–6515 (2001).
45. Liebetau, W., Budde, A., Savoia, A., Grummt, F. & Hoehn, H. p53 activates Fanconi anemia group C gene expression. *Hum Mol Genet* 6, 277–283 (1997).
46. Miller, M. *et al.* p53 activates the CD95 (APO-1/Fas) gene in response to DNA damage by anticancer drugs. *J Exp Med* 188, 2033–2045 (1998).
47. Liu, G. & Chen, X. The ferredoxin reductase gene is regulated by the p53 family and sensitizes cells to oxidative stress-induced apoptosis. *Oncogene* 21, 7195–7204 (2002).
48. Smith, M. L. *et al.* Interaction of the p53-regulated protein Gadd45 with proliferating cell nuclear antigen. *Science* 266, 1376–1380 (1994).
49. Tan, M., Wang, Y., Guan, K. & Sun, Y. PTGF-beta, a type beta transforming growth factor (TGF-beta) superfamily member, is a p53 target gene that inhibits tumor cell growth via TGF-beta signaling pathway. *Proc Natl Acad Sci U S A* 97, 109–114 (2000).
50. Kannan, K., Amariglio, N., Rechavi, G. & Givol, D. Profile of gene expression regulated by induced p53: connection to the TGF-beta family. *FEBS Lett* 470, 77–82 (2000).
51. Kimura, Y. *et al.* Genomic structure and chromosomal localization of GML (GPI-anchored molecule-like protein), a gene induced by p53. *Genomics* 41, 477–480 (1997).
52. Ori, A. *et al.* p53 binds and represses the HBV enhancer: an adjacent enhancer element can reverse the transcription effect of p53. *EMBO J* 17, 544–553 (1998).
53. Feng, Z. *et al.* p53 tumor suppressor protein regulates the levels of huntingtin gene expression. *Oncogene* 25, 1–7 (2006).
54. Metcalfe, A. M., Dixon, R. M. & Radda, G. K. Wild-type but not mutant p53 activates the hepatocyte growth factor/scatter factor promoter. *Nucleic Acids Res* 25, 983–986 (1997).
55. Britschgi, C. *et al.* Identification of the p53 family-responsive element in the promoter region of the tumor suppressor gene hypermethylated in cancer 1. *Oncogene* 25, 2030–2039 (2006).
56. Deguin-Chambon, V., Vacher, M., Jullien, M., May, E. & Bourdon, J. C. Direct transactivation of c-Ha-Ras gene by p53: evidence for its involvement in p53 transactivation activity and p53-mediated apoptosis. *Oncogene* 19, 5831–5841 (2000).
57. Zhang, Y. *et al.* Repression of hsp90beta gene by p53 in UV irradiation induced apoptosis of Jurkat cells. *J Biol Chem* 279, 42545–42551 (2004).
58. Ng, C.-C., Arakawa, H., Fukuda, S., Kondoh, H. & Nakamura, Y. p53RFP, a p53-inducible RING-finger protein, regulates the stability of p21WAF1. *Oncogene* 22, 4449–4458 (2003).
59. Im, H.-J., Pittelkow, M. R. & Kumar, R. Divergent regulation of the growth-promoting gene IEX-1 by the p53 tumor suppressor and Sp1. *J Biol Chem* 277, 14612–14621 (2002).
60. Buckbinder, L. *et al.* Induction of the growth inhibitor IGF-binding protein 3 by p53. *Nature* 377, 646–649 (1995).
61. Mori, T. *et al.* Identification of the interferon regulatory factor 5 gene (IRF-5) as a direct target for p53. *Oncogene* 21, 2914–2918 (2002).
62. Mukhopadhyay, T. & Roth, J. A. p53 involvement in activation of the cytokeratin 8 gene in tumor cell lines. *Anticancer Res* 16, 105–112 (1996).
63. Raimond, J., Rouleux, F., Monsigny, M. & Legrand, A. The second intron of the human galectin-3 gene has a strong promoter activity down-regulated by p53. *FEBS Lett* 363, 165–169 (1995).
64. Hu, W., Feng, Z., Teresky, A. & Levine, A. J. p53 regulates maternal reproduction through LIF. *Nature* 450, 721–724 (2007).

65. Lin, Y., Ma, W. & Benchimol, S. Pidd, a new death-domain-containing protein, is induced by p53 and promotes apoptosis. *Nat Genet* 26, 122–127 (2000).
66. Chun, A. C. S. & Jin, D.-Y. Transcriptional regulation of mitotic checkpoint gene MAD1 by p53. *J Biol Chem* 278, 37439–37450 (2003).
67. Zauberman, A., Flusberg, D., Haupt, Y., Barak, Y. & Oren, M. A functional p53-responsive intronic promoter is contained within the human mdm2 gene. *Nucleic Acids Res* 23, 2584–2592 (1995).
68. Seol, D. W., Chen, Q., Smith, M. L. & Zarnegar, R. Regulation of the c-met proto-oncogene promoter by p53. *J Biol Chem* 274, 3565–3572 (1999).
69. Chen, J. & Sadowski, I. Identification of the mismatch repair genes PMS2 and MLH1 as p53 target genes by using serial analysis of binding elements. *Proc Natl Acad Sci U S A* 102, 4813–4818 (2005).
70. Bian, J. & Sun, Y. Transcriptional activation by p53 of the human type IV collagenase (gelatinase A or matrix metalloproteinase 2) promoter. *Mol Cell Biol* 17, 6330–6338 (1997).
71. Warnick, C. T., Dabbas, B., Ford, C. D. & Strait, K. A. Identification of a p53 response element in the promoter region of the hMSH2 gene required for expression in A2780 ovarian cancer cells. *J Biol Chem* 276, 27363–27370 (2001).
72. Scherer, S. J. et al. p53 and c-Jun functionally synergize in the regulation of the DNA repair gene hMSH2 in response to UV. *J Biol Chem* 275, 37469–37473 (2000).
73. Stein, S. et al. NDRG1 is necessary for p53-dependent apoptosis. *J Biol Chem* 279, 48930–48940 (2004).
74. Sadasivam, S. et al. Caspase-1 activator Ipaf is a p53-inducible gene involved in apoptosis. *Oncogene* 24, 627–636 (2005).
75. Mortensen, K., Skouv, J., Hougaard, D. M. & Larsson, L. I. Endogenous endothelial cell nitric-oxide synthase modulates apoptosis in cultured breast cancer cells and is transcriptionally regulated by p53. *J Biol Chem* 274, 37679–37684 (1999).
76. Urano, T. et al. Cloning of P2XM, a novel human P2X receptor gene regulated by p53. *Cancer Res* 57, 3281–3287 (1997).
77. Oda, K. et al. p53AIP1, a potential mediator of p53-dependent apoptosis, and its regulation by Ser-46-phosphorylated p53. *Cell* 102, 849–862 (2000).
78. Zhu, J. & Chen, X. MCG10, a novel p53 target gene that encodes a KH domain RNA-binding protein, is capable of inducing apoptosis and cell cycle arrest in G(2)-M. *Mol Cell Biol* 20, 5602–5618 (2000).
79. Morris, G. F., Bischoff, J. R. & Mathews, M. B. Transcriptional activation of the human proliferating-cell nuclear antigen promoter by p53. *Proc Natl Acad Sci U S A* 93, 895–899 (1996).
80. Reczek, E. E., Flores, E. R., Tsay, A. S., Attardi, L. D. & Jacks, T. Multiple response elements and differential p53 binding control Perp expression during apoptosis. *Mol Cancer Res* 1, 1048–1057 (2003).
81. Rozenfeld-Granot, G. et al. A positive feedback mechanism in the transcriptional activation of Apaf-1 by p53 and the coactivator Zac-1. *Oncogene* 21, 1469–1476 (2002).
82. Burns, T. F., Fei, P., Scata, K. A., Dicker, D. T. & El-Deiry, W. S. Silencing of the novel p53 target gene Snk/Plk2 leads to mitotic catastrophe in paclitaxel (taxol)-exposed cells. *Mol Cell Biol* 23, 5556–5571 (2003).
83. de Stanchina, E. et al. PML is a direct p53 target that modulates p53 effector functions. *Mol Cell* 13, 523–535 (2004).
84. Yan, J. et al. BLIMP1 regulates cell growth through repression of p53 transcription. *Proc Natl Acad Sci U S A* 104, 1841–1846 (2007).
85. Stambolic, V. et al. Regulation of PTEN transcription by p53. *Mol Cell* 8, 317–325 (2001).
86. Golubovskaya, V., Kaur, A. & Cance, W. Cloning and characterization of the promoter region of human focal adhesion kinase gene: nuclear factor kappa B and p53 binding sites. *Biochim Biophys Acta* 1678, 111–125 (2004).
87. Ohtsuka, T. et al. ASC is a Bax adaptor and regulates the p53-Bax mitochondrial apoptosis pathway. *Nat Cell Biol* 6, 121–128 (2004).
88. Shiio, Y., Yamamoto, T. & Yamaguchi, N. Negative regulation of Rb expression by the p53 gene product. *Proc Natl Acad Sci U S A* 89, 5206–5210 (1992).
89. Dornan, D. et al. The ubiquitin ligase COP1 is a critical negative regulator of p53. *Nature* 429, 86–92 (2004).
90. Tanaka, H. et al. A ribonucleotide reductase gene involved in a p53-dependent cell-cycle checkpoint for DNA damage. *Nature* 404, 42–49 (2000).
91. Tan, M., Heizmann, C. W., Guan, K., Schafer, B. W. & Sun, Y. Transcriptional activation of the human S100A2 promoter by wild-type p53. *FEBS Lett* 445, 265–268 (1999).
92. Han, H. J., Tokino, T. & Nakamura, Y. CSR, a scavenger receptor-like protein with a protective role against cellular damage caused by UV irradiation and oxidative stress. *Hum Mol Genet* 7, 1039–1046 (1998).
93. Adachi, K. et al. Identification of SCN3B as a novel p53-inducible proapoptotic gene. *Oncogene* 23, 7791–7798 (2004).
94. Zou, Z. et al. p53 regulates the expression of the tumor suppressor gene maspin. *J Biol Chem* 275, 6051–6054 (2000).
95. Kunz, C., Pebler, S., Otte, J. & von der Ahe, D. Differential regulation of plasminogen activator and inhibitor gene transcription by the tumor suppressor p53. *Nucleic Acids Res* 23, 3710–3717 (1995).



96. Velasco-Miguel, S. *et al.* PA26, a novel target of the p53 tumor suppressor and member of the GADD family of DNA damage and growth arrest inducible genes. *Oncogene* 18, 127–137 (1999).
97. Hermeking, H. *et al.* 14-3-3 sigma is a p53-regulated inhibitor of G2/M progression. *Mol Cell* 1, 3–11 (1997).
98. Nagy, N. *et al.* Wild-type p53 activates SAP expression in lymphoid cells. *Oncogene* 23, 8563–8570 (2004).
99. Passer, B. J. *et al.* The p53-inducible TSAP6 gene product regulates apoptosis and the cell cycle and interacts with Nix and the Myt1 kinase. *Proc Natl Acad Sci U S A* 100, 2284–2289 (2003).
100. Herzer, K. *et al.* Upregulation of major histocompatibility complex class I on liver cells by hepatitis C virus core protein via p53 and TAP1 impairs natural killer cell cytotoxicity. *J Virol* 77, 8299–8309 (2003).
101. Shin, T. H., Paterson, A. J. & Kudlow, J. E. p53 stimulates transcription from the human transforming growth factor alpha promoter: a potential growth-stimulatory role for p53. *Mol Cell Biol* 15, 4694–4701 (1995).
102. Liu, X., Yue, P., Khuri, F. R. & Sun, S.-Y. p53 upregulates death receptor 4 expression through an intronic p53 binding site. *Cancer Res* 64, 5078–5083 (2004). URL
103. Takimoto, R. & El-Deiry, W. S. Wild-type p53 transactivates the KILLER/DR5 gene through an intronic sequence-specific DNA-binding site. *Oncogene* 19, 1735–1743 (2000).
104. Liu, X., Yue, P., Khuri, F. R. & Sun, S.-Y. Decoy receptor 2 (DeR2) is a p53 target gene and regulates chemosensitivity. *Cancer Res* 65, 9169–9175 (2005).
105. Benoit, V. *et al.* Additive effect between NF-kappaB subunits and p53 protein for transcriptional activation of human p53 promoter. *Oncogene* 19, 4787–4794 (2000).
106. Contente, A., Dittmer, A., Koch, M. C., Roth, J. & Dobbelstein, M. A polymorphic microsatellite that mediates induction of PIG3 by p53. *Nat Genet* 30, 315–320 (2002).
107. Okamura, S. *et al.* p53DINP1, a p53-inducible gene, regulates p53-dependent apoptosis. *Mol Cell* 8, 85–94 (2001).
108. Harnes, D. C. *et al.* Positive and negative regulation of deltaN-p63 promoter activity by p53 and deltaN-p63-alpha contributes to differential regulation of p53 target genes. *Oncogene* 22, 7607–7616 (2003).
109. Chen, X., Zheng, Y., Zhu, J., Jiang, J. & Wang, J. p73 is transcriptionally regulated by DNA damage, p53, and p73. *Oncogene* 20, 769–774 (2001).
110. Nakagawa, T. *et al.* Autoinhibitory regulation of p73 by Delta Np73 to modulate cell survival and death through a p73-specific target element within the Delta Np73 promoter. *Mol Cell Biol* 22, 2575–2585 (2002).
111. Park, W.-R. & Nakamura, Y. p53CSV, a novel p53-inducible gene involved in the p53-dependent cell-survival pathway. *Cancer Res* 65, 1197–1206 (2005).
112. Obad, S. *et al.* Staf50 is a novel p53 target gene conferring reduced clonogenic growth of leukemic U-937 cells. *Oncogene* 23, 4050–4059 (2004).
113. Feng, Z. *et al.* The regulation of AMPK beta1, TSC2, and PTEN expression by p53: stress, cell and tissue specificity, and the role of these gene products in modulating the IGF-1-AKT-mTOR pathways. *Cancer Res* 67, 3043–3053 (2007).
114. Nylander, K. *et al.* Transcriptional activation of tyrosinase and TRP-1 by p53 links UV irradiation to the protective tanning response. *J Pathol* 190, 39–46 (2000).
115. Zhang, D. W., Jeang, K.-T. & Lee, C. G. L. p53 negatively regulates the expression of FAT10, a gene upregulated in various cancers. *Oncogene* 25, 2318–2327 (2006).
116. Yoon, H. *et al.* Gene expression profiling of isogenic cells with different TP53 gene dosage reveals numerous genes that are affected by TP53 dosage and identifies CSPG2 as a direct target of p53. *Proc Natl Acad Sci U S A* 99, 15632–15637 (2002).
117. Maruyama, R. *et al.* Comparative genome analysis identifies the vitamin D receptor gene as a direct target of p53-mediated transcriptional activation. *Cancer Res* 66, 4574–4583 (2006).
